# Supplementary material for: Fat Loss in Patients with Metastatic Clear Cell Renal Cell Carcinoma Treated with Immune Checkpoint Inhibitors
Source: MDPI journal article supplement (doi:10.3390/ijms24043994), 2023-02-16
Supplement: s1 [file s1]

# Fat loss in Patients with Metastatic Clear Cell Renal Cell Carcinoma Treated with Immune Checkpoint Inhibitors

## Supplemental Material

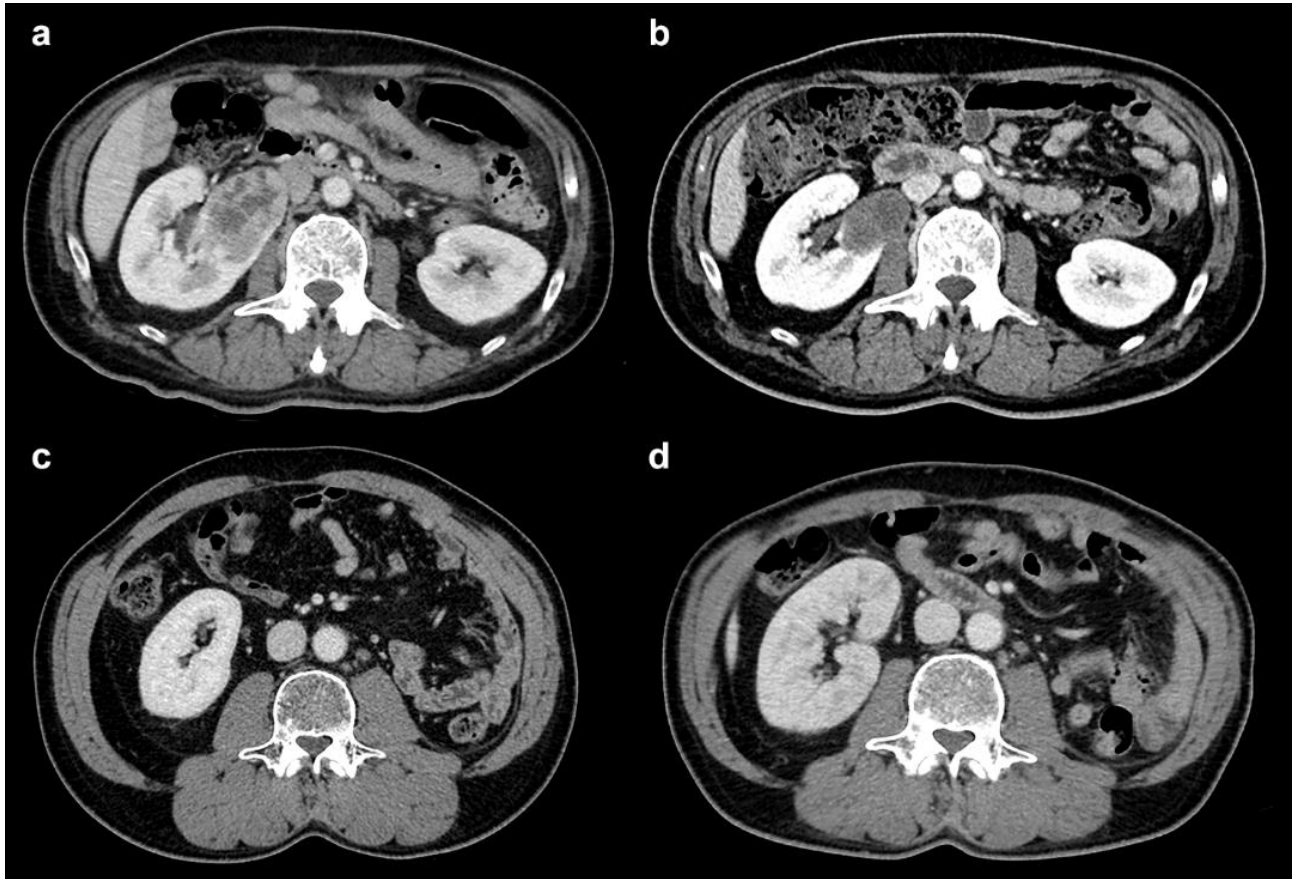

**Supplemental Figure S1. Representative CT images showing body composition changes in two patients with metastatic clear cell renal cell carcinoma**

Pretreatment (a) and posttreatment CT images after 75 days (b) of a 65-year-old man who achieved a partial response. The cross-sectional areas of subcutaneous fat, visceral fat, and total fat changed from 99.9 cm<sup>2</sup>, 77.5 cm<sup>2</sup>, and 177.4 cm<sup>2</sup> to 105.7 cm<sup>2</sup>, 85.2 cm<sup>2</sup>, and 190.9 cm<sup>2</sup>, respectively: these changes were not significant. Pretreatment (c) and post-treatment CT images after 70 days (d) of a 52-year-old man who exhibited progressive disease after four months. The cross-sectional areas of subcutaneous fat, visceral fat, and total fat substantially decreased from 110.6 cm<sup>2</sup>, 150.5 cm<sup>2</sup>, and 261.0 cm<sup>2</sup> to 80.7 cm<sup>2</sup>, 89.9 cm<sup>2</sup>, and 170.6 cm<sup>2</sup>, respectively. CT, computed tomography.

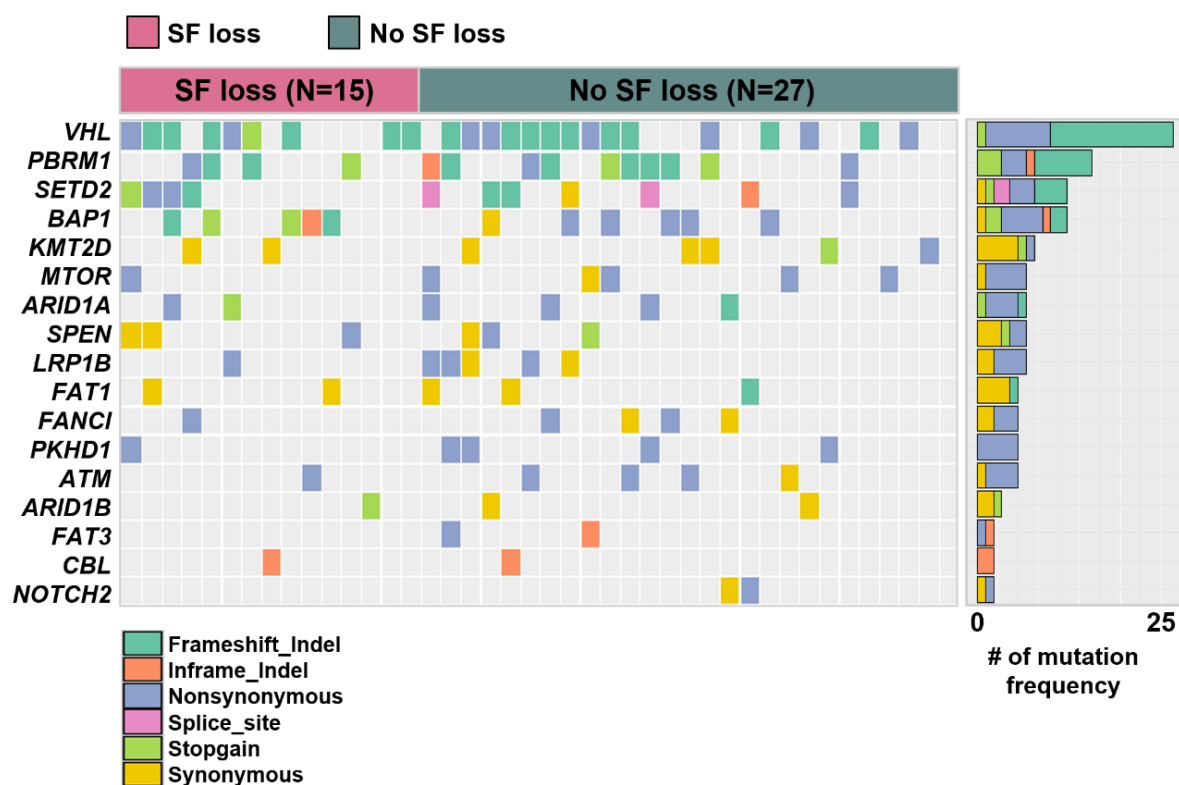

**Supplemental Figure S2. Overall mutational landscape in patients with clear cell renal cell carcinoma with and without SF loss**

A heatmap showing 17 recurrently mutated genes ordered by mutation frequency. SF, subcutaneous fat.

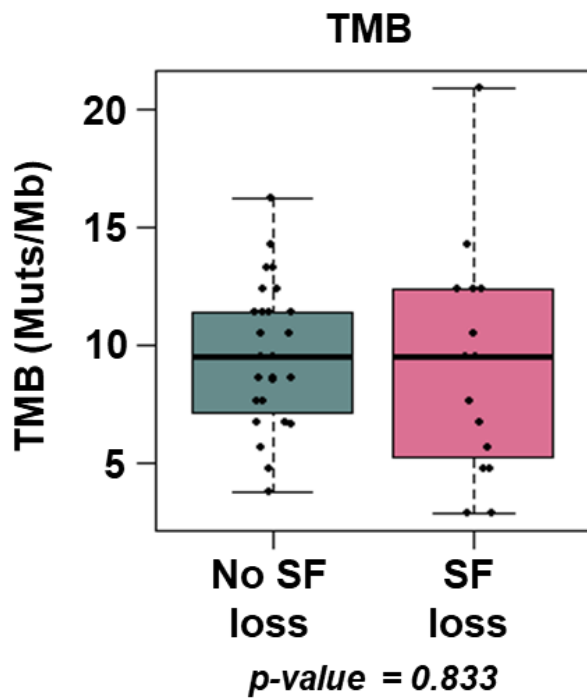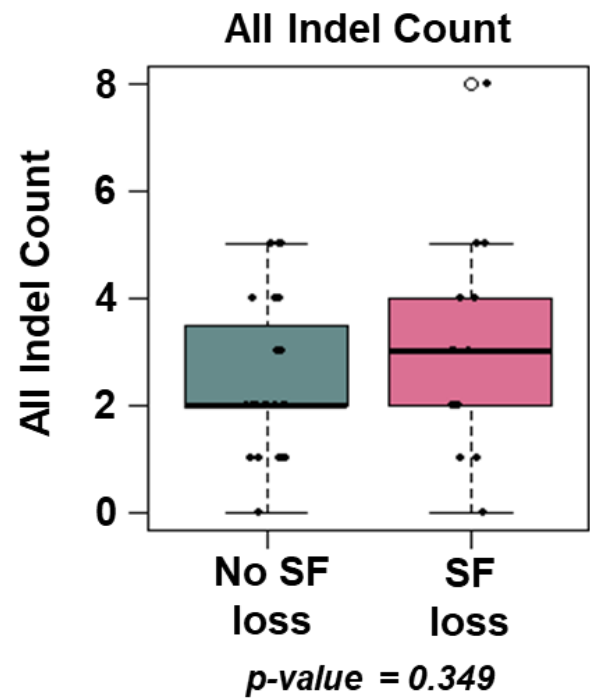

**Supplemental Figure S3. Genomic alterations according to SF loss**

Tumor mutational burden and total indel count between samples without and with SF loss. T-test p-value shown. Midlines and bars indicate the medians and the 5–95th percentiles, respectively. Muts, mutations; Mb, megabase; TMB, tumor mutational burden; SF, subcutaneous fat.

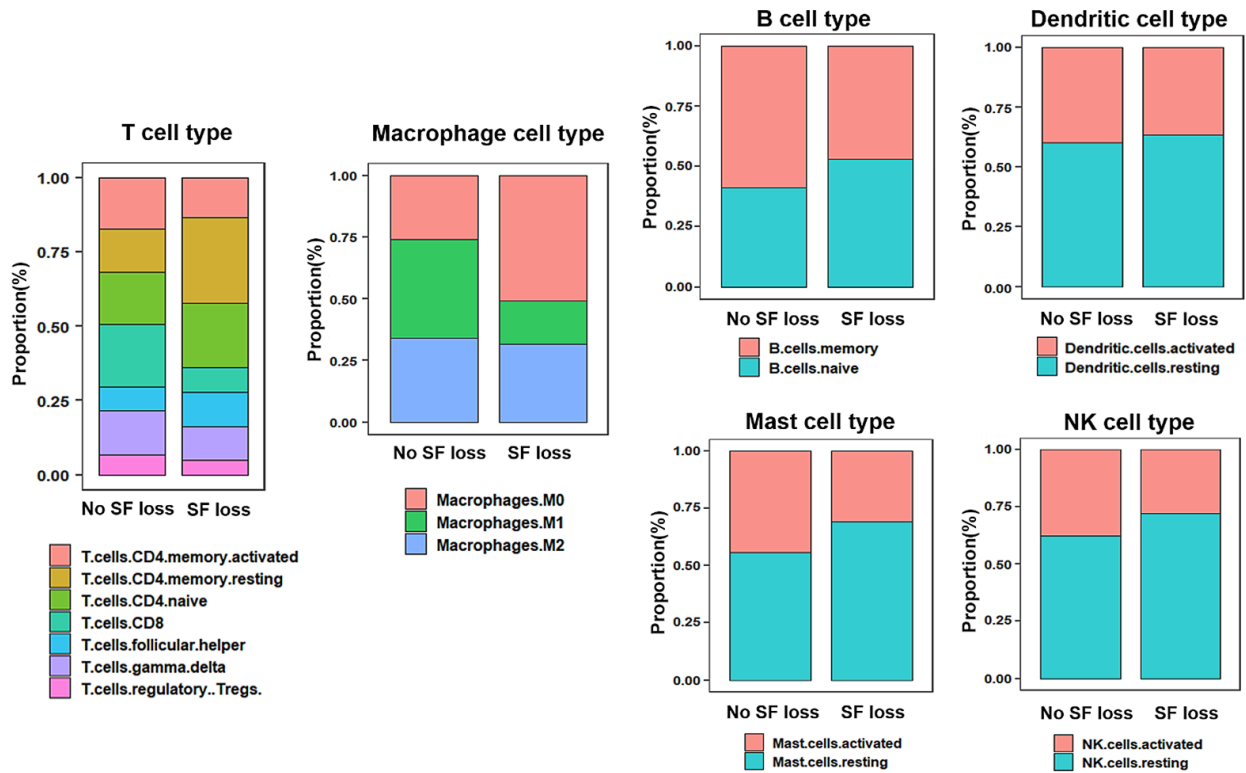

**Supplemental Figure S4. Proportion of diverse immune cell subpopulations according to SF loss**

CIBERSORTx findings showing a comparison of the percentage of distinct immune cell subpopulations (T cells, macrophages, B cells, dendritic cells, mast cells, and NK cells) according to SF loss. SF, subcutaneous fat.

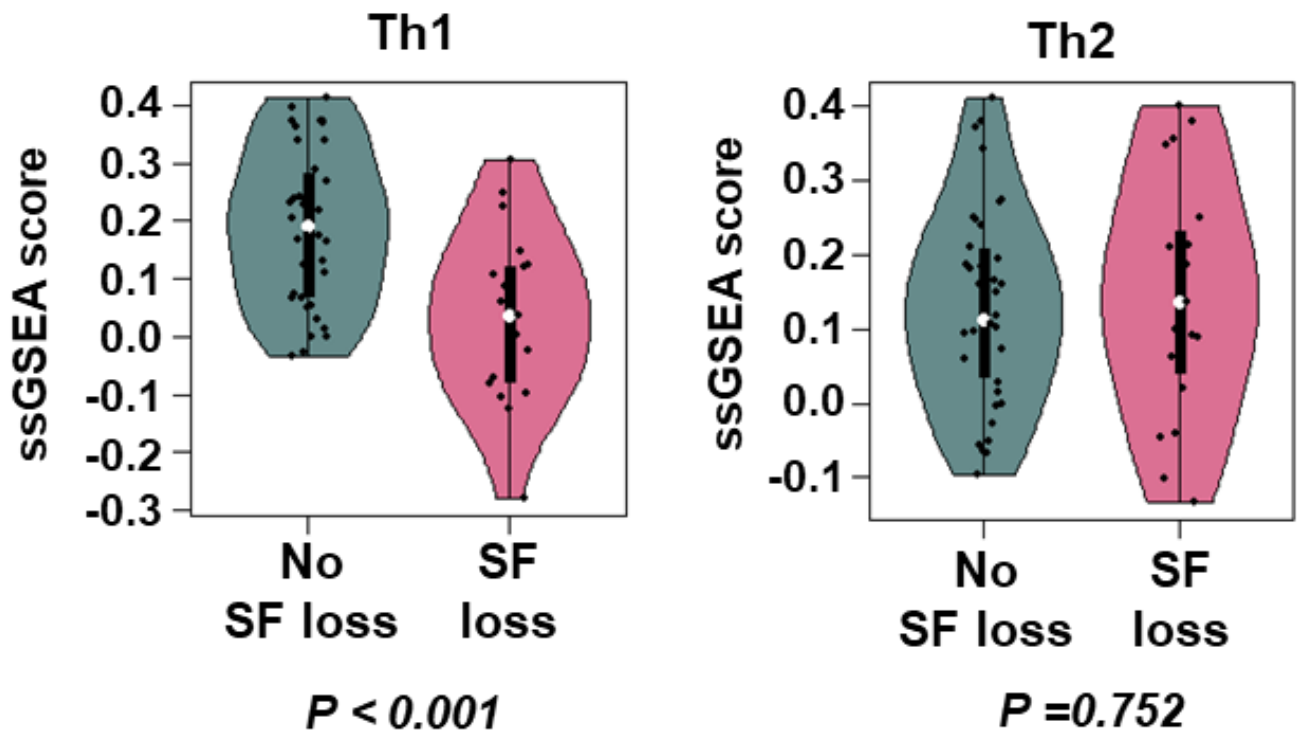

**Supplemental Figure S5. ssGSEA analysis using the gene signatures of Th1 and Th2**

Violin plots showing ssGSEA scores using the gene signatures of Th1 and Th2 from Bindea *et al.* in groups with and without SF loss. SF, subcutaneous fat; ssGSEA, single-sample gene set enrichment test.

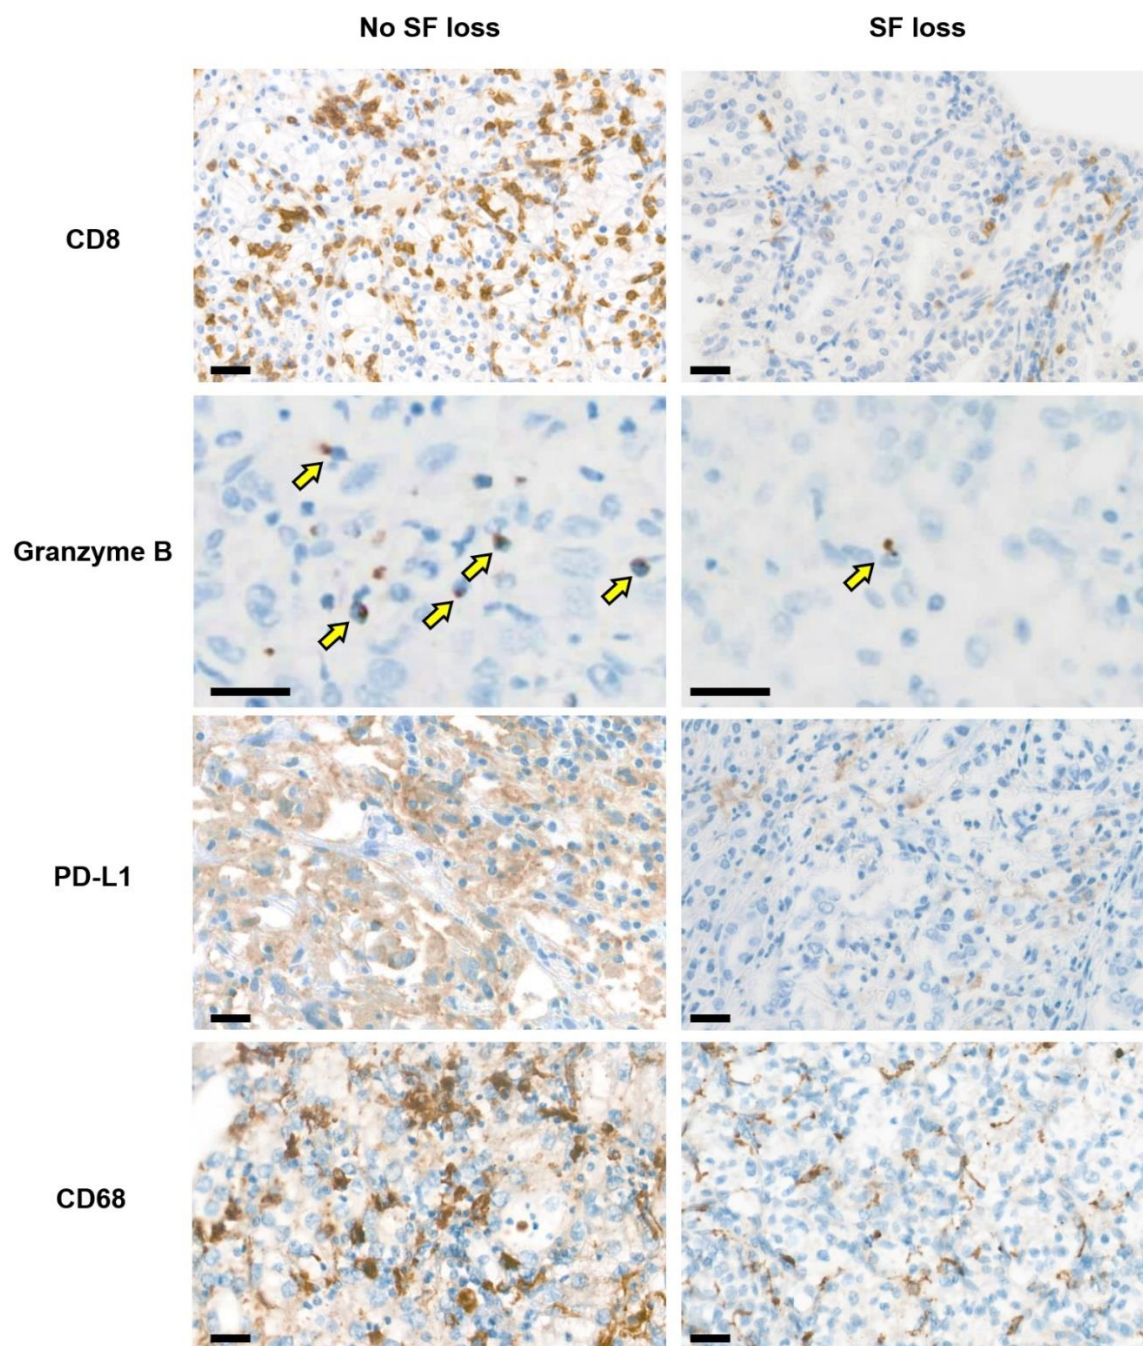

**Supplemental Figure S6. Immune cell population characterized by IHC in patients without SF loss and patients with SF loss**

Representative IHC images of CD8, granzyme B, PD-L1, and CD68 staining in patients without SF loss (*left*) and patients with SF loss (*right*). Granzyme B<sup>+</sup> cells are indicated by yellow arrows. Scale bars in the micrographs indicate 25  $\mu$ m. IHC, immunohistochemistry; SF, SF loss.

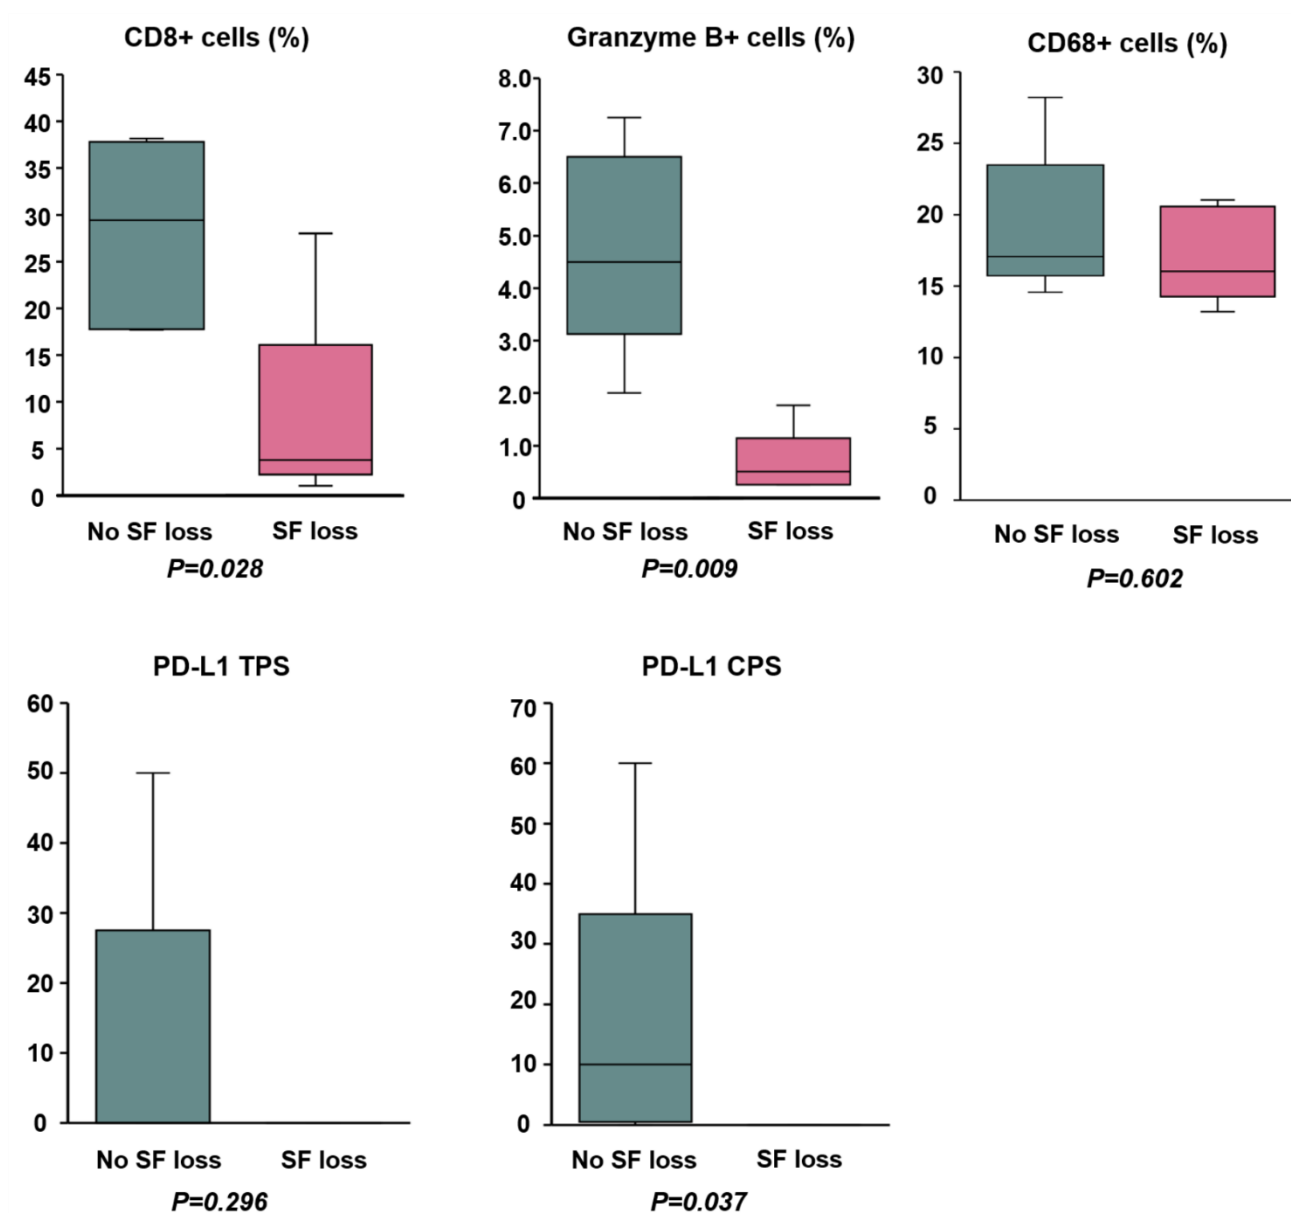

**Supplemental Figure S7. Quantification of CD8, Granzyme B, PD-L1, and CD68 expressing cells in representative samples of patients without SF loss ( $n = 5$ ) and patients with SF loss ( $n = 5$ )**

Midlines and bars indicate the medians and the 5–95th percentiles, respectively. SF, subcutaneous fat loss; TPS, tumor proportional score; CPS, combined positive score.

**Supplemental Table S1.** Objective response rate, best overall response, and response group stratified by subcutaneous fat loss.

| <b>Variables</b>                      | <b>SF loss <sup>†</sup> (<i>n</i> = 20)</b> | <b>No SF loss (<i>n</i> = 40)</b> | <b><i>p</i></b> |
|---------------------------------------|---------------------------------------------|-----------------------------------|-----------------|
| Objective response rate, % (95% CI) * | 10.0% (1.2–31.7%)                           | 62.5% (45.8–77.3%)                | <0.001          |
| Best overall response *               |                                             |                                   | <0.001          |
| Complete response, <i>n</i> (%) *     | 0 (0.0%)                                    | 6 (15.0%)                         | 0.165           |
| Partial response, <i>n</i> (%) *      | 2 (10.0%)                                   | 19 (47.5%)                        | 0.004           |
| Stable disease, <i>n</i> (%) *        | 2 (10.5%)                                   | 7 (17.5%)                         | 0.704           |
| Progressive disease, <i>n</i> (%) *   | 15 (75.0%)                                  | 8 (20.0%)                         | <0.001          |
| Unable to determine, <i>n</i> (%)     | 1 (0.5%)                                    | 0 (0.0%)                          | –               |
| Response group *                      |                                             |                                   | <0.001          |
| Clinical benefit, <i>n</i> (%) *      | 2 (10.0%)                                   | 25 (62.5%)                        | <0.001          |
| Intermediate benefit, <i>n</i> (%) *  | 2 (10.0%)                                   | 5 (12.5%)                         | 1.000           |
| No clinical benefit, <i>n</i> (%) *   | 15 (75.0%)                                  | 10 (25.0%)                        | <0.001          |
| Unable to determine, <i>n</i> (%)     | 1 (0.5%)                                    | 0 (0.0%)                          | –               |

CI: confidence interval; SF: subcutaneous fat.

\* Fisher's exact test.

<sup>†</sup> Defined as  $\Delta\text{SF} < -5\%$ /month.



**Supplemental Table S2.** Multivariable models for interaction of fat loss with line of treatment and IMDC risk criteria.

| Characteristic | Line of treatment                    |                                      | <i>p</i> for inter-action | IMDC risk criteria                   |                                      | <i>p</i> for inter-action |
|----------------|--------------------------------------|--------------------------------------|---------------------------|--------------------------------------|--------------------------------------|---------------------------|
|                | First line                           | Non-first line                       |                           | Favorable / intermediate             | Poor                                 |                           |
|                | Adjusted HR <sup>†</sup><br>(95% CI) | Adjusted HR <sup>†</sup><br>(95% CI) |                           | Adjusted HR <sup>‡</sup><br>(95% CI) | Adjusted HR <sup>‡</sup><br>(95% CI) |                           |
| <b>OS</b>      |                                      |                                      |                           |                                      |                                      |                           |
| ΔSF *          | 2.32 (0.61–8.81)                     | 1.42 (0.98–2.04)                     | 0.926                     | 1.41 (0.89–2.25)                     | 2.11 (0.82–5.40)                     | 0.968                     |
| ΔVF *          | 1.12 (0.85–1.47)                     | 1.17 (0.96–1.43)                     | 0.631                     | 1.11 (0.84–1.46)                     | 1.17 (0.93–1.47)                     | 0.894                     |
| ΔTF *          | 1.41 (0.72–2.75)                     | 1.38 (0.96–1.99)                     | 0.710                     | 1.33 (0.83–2.14)                     | 1.42 (0.88–2.28)                     | 0.490                     |
| <b>PFS</b>     |                                      |                                      |                           |                                      |                                      |                           |
| ΔSF *          | 2.84 (1.30–6.24)                     | 1.52 (1.09–2.10)                     | 0.902                     | 1.85 (1.20–2.86)                     | 2.67 (0.95–7.50)                     | 0.581                     |
| ΔVF *          | 1.12 (0.90–1.38)                     | 1.11 (0.99–1.25)                     | 0.570                     | 1.15 (0.96–1.38)                     | 1.13 (0.94–1.35)                     | 0.962                     |
| ΔTF *          | 1.57 (0.96–2.57)                     | 1.29 (1.03–1.61)                     | 0.983                     | 1.54 (1.08–2.19)                     | 1.43 (0.95–2.16)                     | 0.540                     |

IMDC: International Metastatic Renal Cell Carcinoma Database Consortium; SF: subcutaneous fat; VF: visceral fat; TF: total fat; HR: hazard ratio; CI: confidence interval; OS: overall survival; PFS: progression-free survival.

\* Continuously, per -5 %/month.

<sup>†</sup> Adjusted for age ( $\geq 65$  years/ $<65$  years), sex (male/female), ΔBW (continuously, per 1 %/month), prior nephrectomy (yes/no), ECOG performance status ( $\geq 1/0$ ), IMCD risk criteria (favorable/intermediate/poor), and number of metastases ( $\geq 2/1$ ).

<sup>‡</sup> Adjusted for age ( $\geq 65$  years/ $<65$  years), sex (male/female), ΔBW (continuously, per 1 %/month), line of treatment (first line/non-first line), prior nephrectomy (yes/no), ECOG performance status ( $\geq 1/0$ ), and number of metastases ( $\geq 2/1$ ).
